# Supplementary material for: Fungal and Bacterial Communities Exhibit Consistent Responses to Reversal of Soil Acidification and Phosphorus Limitation over Time
Source: MDPI journal article supplement (doi:10.3390/microorganisms8010001), 2019-12-18
Supplement: s1 [file s1]

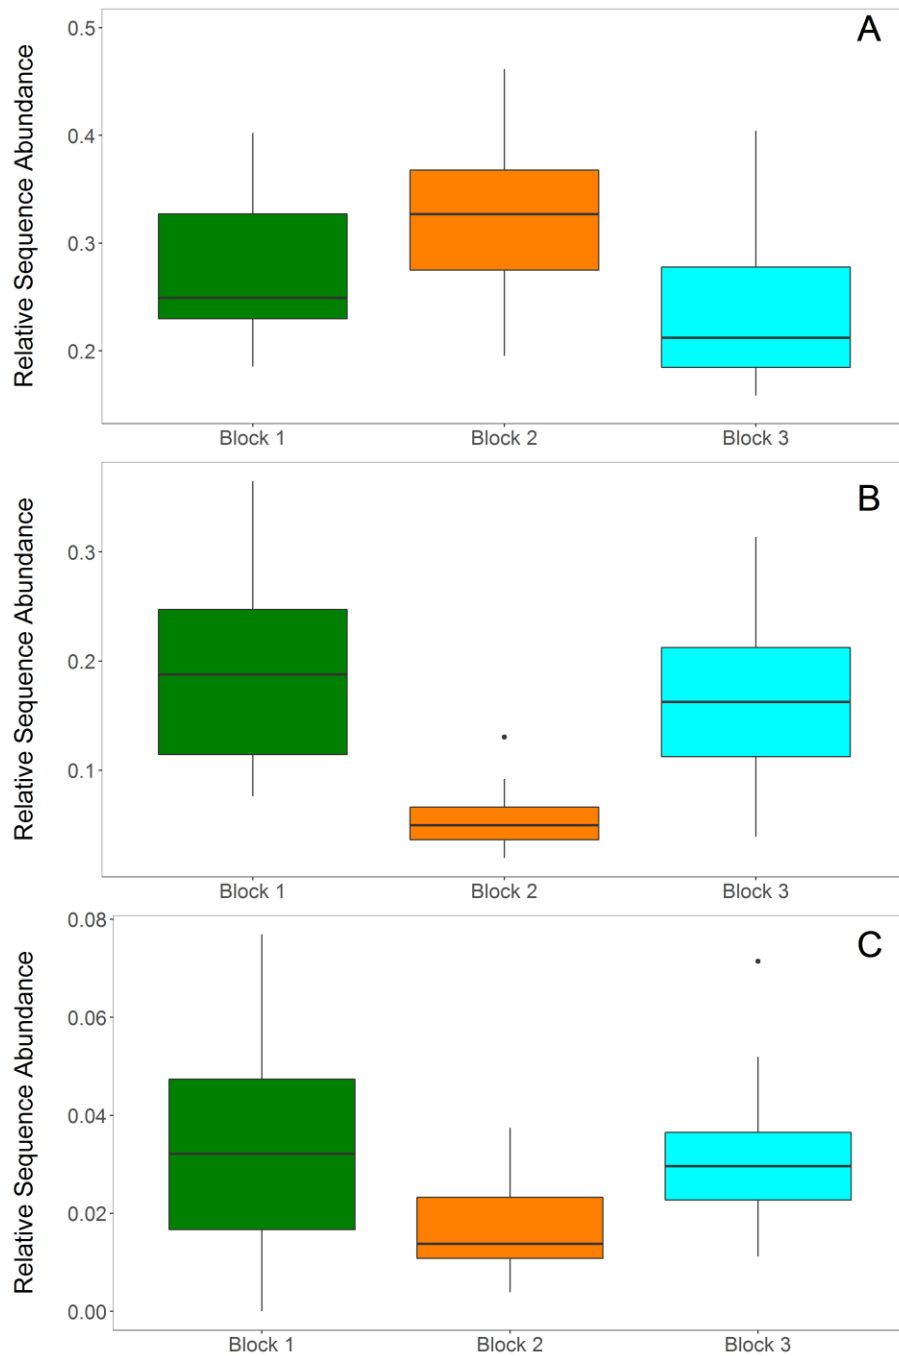

**Figure S1.** Relative sequence numbers of A) saprotrophic, B) ectomycorrhizal, and C) ericoid mycorrhizal fungi at each block. Block 2 had lower relative numbers of mycorrhizal taxa and higher relative numbers of saprotrophic taxa.
